# Supplementary material for: Trends in the Surgical Treatment of Pseudotumor Cerebri Syndrome in the United States
Source: PubMed Central journal article supplement (PMC7739135; doi:10.1001/jamanetworkopen.2020.29669), 2020-12-15

## Supplementary Online Content

Hamedani AG, Thibault DP, Revere KE, et al. Trends in the surgical treatment of pseudotumor cerebri syndrome in the United States. *JAMA Netw Open*. 2020;3(12):e2029669. doi:10.1001/jamanetworkopen.2020.29669

**eTable 1.** Diagnostic and Procedural Code Definitions for Optic Nerve Sheath Fenestration, CSF Shunting, and Exclusionary Diagnoses

**eTable 2.** Number of ONSF and CSF Shunt Procedures for PTCS by Quarter, NIS 2015-2016

**eFigure.** Flowchart of Inclusion and Exclusion Criteria for Analyses of ONSF vs. CSF Shunting for PTCS, NIS 2010-2016

This supplementary material has been provided by the authors to give readers additional information about their work.

**eTable 1.** Diagnostic and procedural code definitions for optic nerve sheath fenestration, CSF shunting, and exclusionary diagnoses

| Diagnosis or procedure          | ICD-9 code(s)                                                                                                                                   | ICD-10 code(s)                                                                                                                                                                                                                                                                                                                                                                                                                                                                                                                                                                                                                                                                                                                                                                                                                                                                                                                                                                                                                                                                                                                                                                                                                                                   |
|---------------------------------|-------------------------------------------------------------------------------------------------------------------------------------------------|------------------------------------------------------------------------------------------------------------------------------------------------------------------------------------------------------------------------------------------------------------------------------------------------------------------------------------------------------------------------------------------------------------------------------------------------------------------------------------------------------------------------------------------------------------------------------------------------------------------------------------------------------------------------------------------------------------------------------------------------------------------------------------------------------------------------------------------------------------------------------------------------------------------------------------------------------------------------------------------------------------------------------------------------------------------------------------------------------------------------------------------------------------------------------------------------------------------------------------------------------------------|
| Optic nerve sheath fenestration | 04.42 04.03 04.04                                                                                                                               | 009G00Z 009G0ZZ 009G3ZZ 009G40Z 009G4ZZ<br>00CG0ZZ 00CG3ZZ 00CG4ZZ 00NG0ZZ 00NG3ZZ<br>00NG4ZZ 008G0ZZ 008G3ZZ 008G4ZZ                                                                                                                                                                                                                                                                                                                                                                                                                                                                                                                                                                                                                                                                                                                                                                                                                                                                                                                                                                                                                                                                                                                                            |
| CSF shunting                    | 02.31 02.32 02.33<br>02.34 02.35 02.39<br>02.42 02.43 03.71<br>03.72 03.79                                                                      | 0016070 0016071 0016072 0016073 0016074<br>0016075 0016076 0016077 0016078 001607B<br>00160J0 00160J1 00160J2 00160J3 00160J4 00160J5<br>00160J6 00160J7 00160J8 00160JB 00160K0<br>00160K1 00160K2 00160K3 00160K4 00160K5<br>00160K6 00160K7 00160K8 00160KB 00160ZB<br>0016370 0016371 0016372 0016373 0016374<br>0016375 0016376 0016377 0016378 001637B<br>00163J0 00163J1 00163J2 00163J3 00163J4 00163J5<br>00163J6 00163J7 00163J8 00163JB 00163K0<br>00163K1 00163K2 00163K3 00163K4 00163K5<br>00163K6 00163K7 00163K8 00163KB 00163ZB<br>0016470 0016471 0016472 0016473 0016474<br>0016475 0016476 0016477 0016478 001647B<br>00164J0 00164J1 00164J2 00164J3 00164J4 00164J5<br>00164J6 00164J7 00164J8 00164JB 00164K0<br>00164K1 00164K2 00164K3 00164K4 00164K5<br>00164K6 00164K7 00164K8 00164KB 00164ZB<br>001U072 001U074 001U076 001U077 001U079<br>001U0J2 001U0J4 001U0J6 001U0J7 001U0J9<br>001U0K2 001U0K4 001U0K6 001U0K7 001U0K9<br>001U372 001U374 001U376 001U377 001U379<br>001U3J2 001U3J4 001U3J6 001U3J7 001U3J9<br>001U3K2 001U3K4 001U3K6 001U3K7 001U3K9<br>001U472 001U474 001U476 001U477 001U479<br>001U4J2 001U4J4 001U4J6 001U4J7 001U4J9<br>001U4K2 001U4K4 001U4K6 001U4K7 001U4K9<br>0W110J9 0W110JB 0W110JG 0W110JJ |
| Cerebral venous thrombosis      | 437.6                                                                                                                                           | I67.6                                                                                                                                                                                                                                                                                                                                                                                                                                                                                                                                                                                                                                                                                                                                                                                                                                                                                                                                                                                                                                                                                                                                                                                                                                                            |
| Hydrocephalus                   | 331.3 331.4 331.5                                                                                                                               | G91.0 G91.1 G91.3 G91.8 G91.9                                                                                                                                                                                                                                                                                                                                                                                                                                                                                                                                                                                                                                                                                                                                                                                                                                                                                                                                                                                                                                                                                                                                                                                                                                    |
| Meningitis/encephalitis         | HCUP Clinical Classification Software 76 and 77                                                                                                 |                                                                                                                                                                                                                                                                                                                                                                                                                                                                                                                                                                                                                                                                                                                                                                                                                                                                                                                                                                                                                                                                                                                                                                                                                                                                  |
| Brain tumor, abscess, etc.      | 191.0 191.1 191.2<br>191.3 191.4 191.5<br>191.6 191.7 191.8<br>191.9 192.0 192.1<br>192.2 192.3 192.8<br>192.9 198.3 198.4<br>225.0 225.1 225.2 | C70xx C71xx C72xx C793-C794xx D32xx D33xx<br>D4xx G93.0 G93.5 G93.6, G96.19 G06xx G07xx                                                                                                                                                                                                                                                                                                                                                                                                                                                                                                                                                                                                                                                                                                                                                                                                                                                                                                                                                                                                                                                                                                                                                                          |

|  |                                                                                                       |  |
|--|-------------------------------------------------------------------------------------------------------|--|
|  | 225.3 225.4 225.8<br>225.9 237.5 237.6<br>239.6 239.7 348.0<br>348.4 348.5 349.2<br>324.0 324.1 324.9 |  |
|--|-------------------------------------------------------------------------------------------------------|--|

**eTable 2.** Number of ONSF and CSF shunt procedures for PTCS by quarter, NIS 2015-2016

|                       | 2015 q1                 | 2015 q2                 | 2015 q3                 | 2015 q4                 | 2016 q1                 | 2016 q2                 | 2016 q3                 | 2016 q4                 |
|-----------------------|-------------------------|-------------------------|-------------------------|-------------------------|-------------------------|-------------------------|-------------------------|-------------------------|
| Total PTCS admissions | 3700<br>(3327-<br>4073) | 3310<br>(2947-<br>3673) | 3765<br>(3385-<br>4145) | 4345<br>(3929-<br>4761) | 4385<br>(3964-<br>4806) | 4295<br>(3897-<br>4693) | 4915<br>(4474-<br>5356) | 4415<br>(4003-<br>4827) |

**eFigure.** Flowchart of inclusion and exclusion criteria for analyses of ONSF vs. CSF shunting for PTCS, NIS 2010-2016

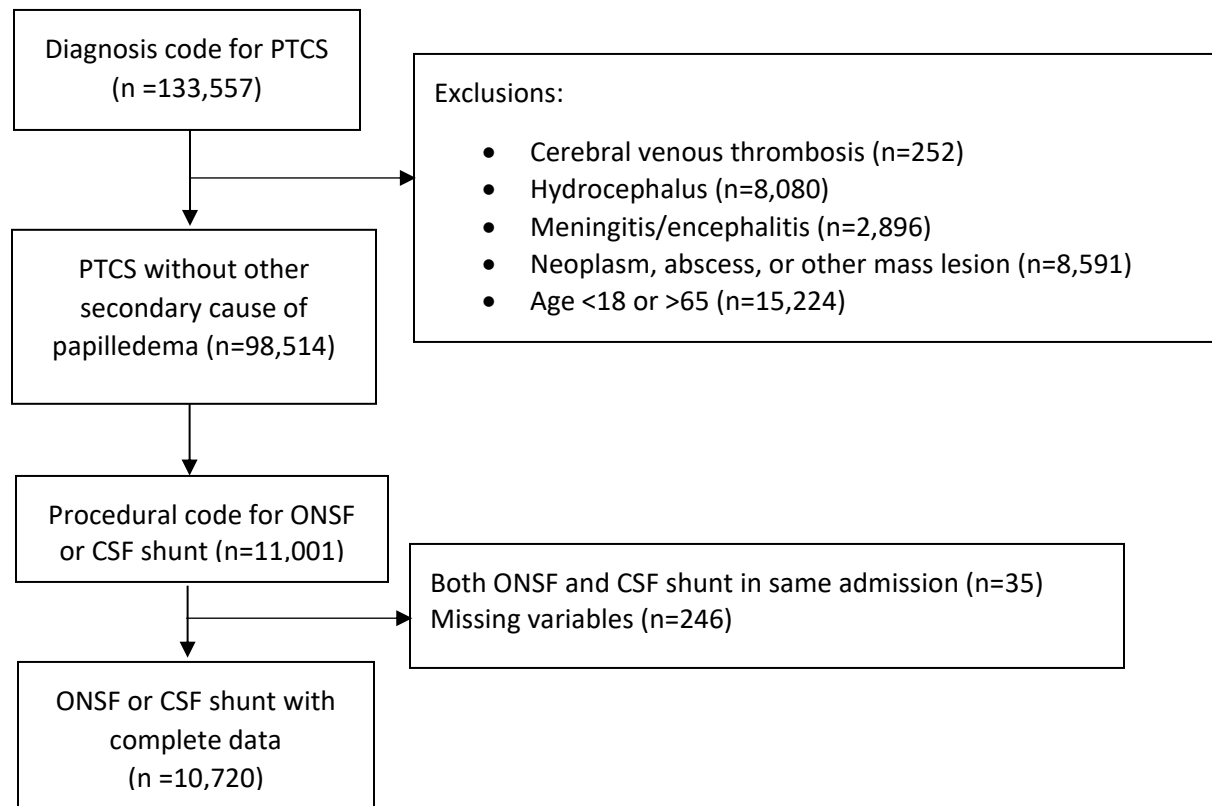

Supplement: jamanetwopen-e2029669-s001.pdf [file jamanetwopen-e2029669-s001.pdf]
